# Supplementary material
Source: PubMed Central journal article supplement (PMC5523830)
Supplement: NIHMS879240-supplement-Supplemental_Material.pdf [file NIHMS879240-supplement-Supplemental_Material.pdf]

SUPPLEMENTAL MATERIAL

Figure Legend:

**Figure 1: Sex-Differences in Heart Transplantation Over Time**

Sex-specific cumulative incidence curves were generated for patients initially listed as (A) UNOS Status 1A, (B) UNOS Status 1B, and (C) UNOS Status 2 during three time periods: 2004-2008, 2009-2011, and 2012-2015. Figures show uncertainty in estimators of plus or minus two standard errors, where standard errors were estimated using subsampling.

Figure 1A

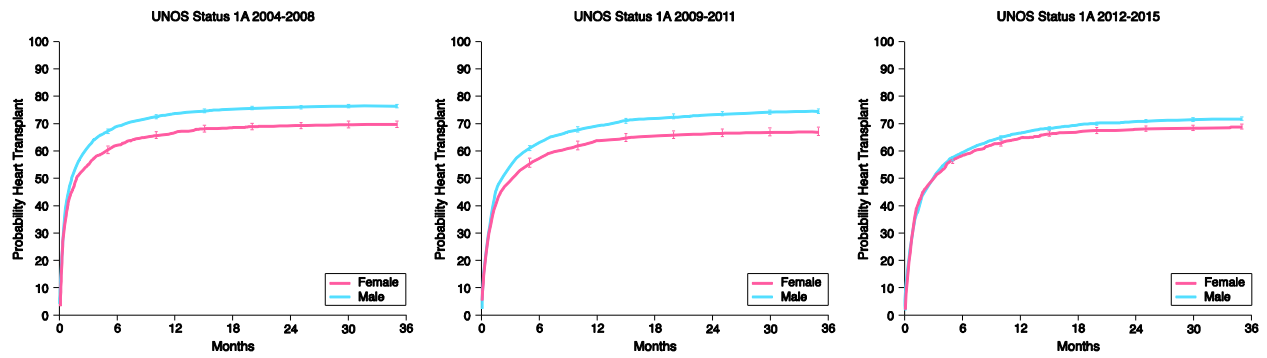

Figure 1B

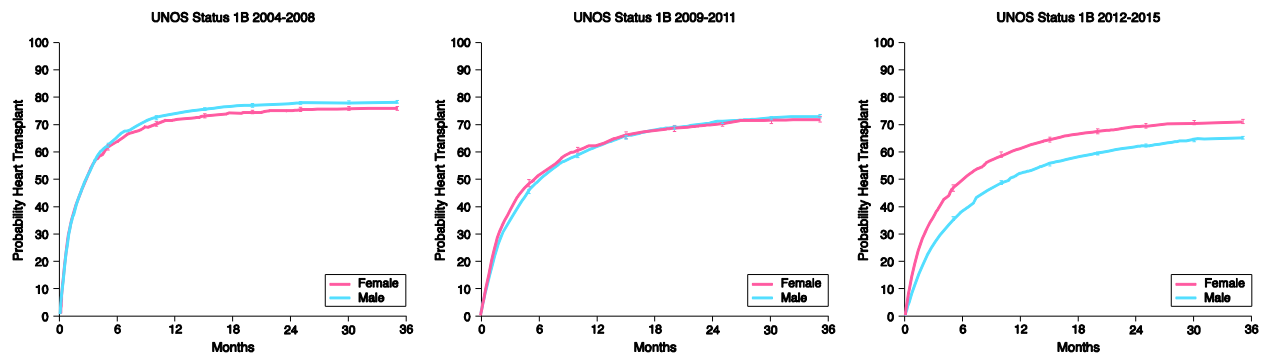

Figure 1C

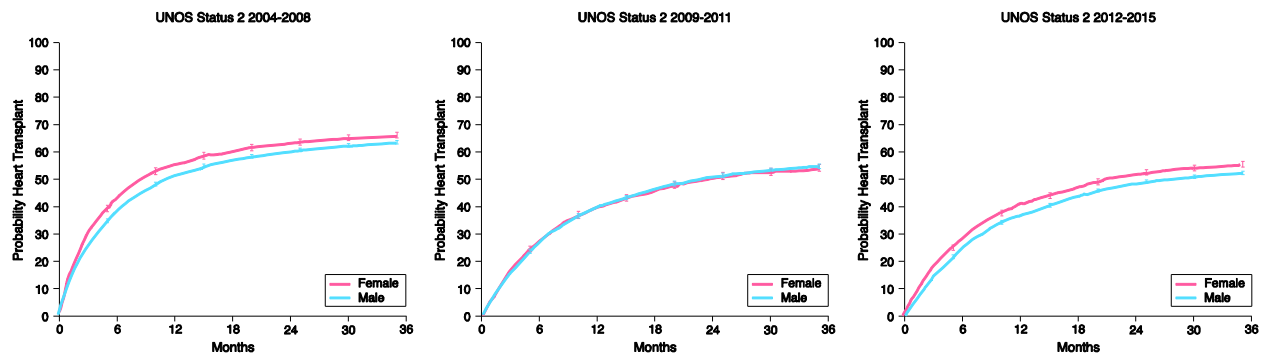

**Table 1. Sex-Differences in Baseline Characteristics While Awaiting Heart**

**Transplantation**

| Variable                | UNOS Status 1A |            | UNOS Status 1B |            | UNOS Status 2 |            |
|-------------------------|----------------|------------|----------------|------------|---------------|------------|
|                         | Female         | Male       | Female         | Male       | Female        | Male       |
|                         | N= 1965        | N=5716     | N=3226         | N=9801     | N=3197        | N=9164     |
| Age(y), median (Q1, Q3) | 51 (37,59)     | 55 (45,62) | 53 (40,60)     | 56 (46,62) | 51 (39,59)    | 57 (48,62) |
| Race, n (%)             |                |            |                |            |               |            |
| White                   | 1150 (59)      | 3802 (67)  | 1802 (56)      | 6433 (66)  | 2156 (67)     | 6999 (76)  |
| Black                   | 558 (28)       | 1157 (20)  | 1069 (33)      | 2252 (23)  | 674 (21)      | 1246 (14)  |
| Hispanic                | 176 (9)        | 467 (8)    | 243 (8)        | 781 (8)    | 253 (8)       | 594 (6)    |
| Asian                   | 58 (3)         | 234 (4)    | 73 (2)         | 256 (3)    | 71 (2)        | 213 (2)    |
| Other                   | 23 (1)         | 56 (1)     | 39 (1)         | 79 (1)     | 43 (1)        | 112 (1)    |
| BMI, median (Q1, Q3)    | 25 (22, 29)    | 27 (24,30) | 26 (23,31)     | 27 (24,31) | 27(23, 31)    | 28 (25,31) |
| Insurance, n (%)        |                |            |                |            |               |            |
| Private                 | 1084 (55)      | 3138 (55)  | 1609 (50)      | 5107 (52)  | 1857 (58)     | 4984 (54)  |
| Medicare                | 451 (23)       | 1567 (27)  | 966 (30)       | 3067 (31)  | 830 (26)      | 2950 (32)  |
| Medicaid                | 347 (18)       | 719 (13)   | 543 (17)       | 1142 (12)  | 414 (13)      | 767 (8)    |
| Other                   | 83 (4)         | 292 (5)    | 108 (3)        | 485 (5)    | 96 (3)        | 463 (5)    |
| Year, n (%)             |                |            |                |            |               |            |

|                       |           |           |           |           |           |           |
|-----------------------|-----------|-----------|-----------|-----------|-----------|-----------|
| 2004                  | 127 (6)   | 346 (6)   | 187 (6)   | 508 (5)   | 258 (8)   | 904 (10)  |
| 2005                  | 115 (6)   | 334 (6)   | 173 (5)   | 556 (6)   | 259 (8)   | 841 (9)   |
| 2006                  | 109 (6)   | 343 (6)   | 192 (6)   | 653 (7)   | 270 (8)   | 869 (9)   |
| 2007                  | 126 (6)   | 422 (7)   | 213 (7)   | 656 (7)   | 263 (8)   | 826 (9)   |
| 2008                  | 144 (7)   | 454 (8)   | 279(9)    | 768 (8)   | 247 (8)   | 792 (9)   |
| 2009                  | 159 (8)   | 436 (8)   | 262 (8)   | 851 (9)   | 283 (9)   | 827 (9)   |
| 2010                  | 163 (8)   | 494 (9)   | 294 (9)   | 850 (9)   | 308 (10)  | 793 (9)   |
| 2011                  | 177 (9)   | 501 (9)   | 312 (10)  | 857 (9)   | 253 (8)   | 694 (8)   |
| 2012                  | 206 (10)  | 582 (10)  | 313 (10)  | 979 (10)  | 276 (9)   | 650 (7)   |
| 2013                  | 235 (12)  | 619 (11)  | 351 (11)  | 1073 (11) | 260(8)    | 694 (8)   |
| 2014                  | 245 (12)  | 694 (12)  | 370 (11)  | 1195 (12) | 304 (10)  | 791 (9)   |
| 2015 until 8/31/15    | 159 (8)   | 491 (9)   | 280 (9)   | 855 (9)   | 216 (7)   | 483 (5)   |
| ABO blood type, n (%) |           |           |           |           |           |           |
| A                     | 731 (37)  | 2207 (39) | 1162 (36) | 3651 (37) | 1172(37)  | 3685 (40) |
| B                     | 321 (16)  | 840 (15)  | 441 (14)  | 1361 (14) | 401 (13)  | 1090 (12) |
| O                     | 826 (42)  | 2361 (41) | 1464 (45) | 4357 (44) | 1498 (47) | 3992 (44) |
| AB                    | 87 (4)    | 308 (5)   | 159 (5)   | 432 (4)   | 126 (4)   | 397 (4)   |
| Diagnosis, n (%)      |           |           |           |           |           |           |
| Dilated               | 1185 (60) | 2634 (46) | 2120 (66) | 4877 (50) | 1655 (52) | 3245(35)  |

|                                                   |               |               |               |               |               |               |
|---------------------------------------------------|---------------|---------------|---------------|---------------|---------------|---------------|
| Ischemic                                          | 400 (20)      | 2459 (43)     | 631 (20)      | 4058 (41)     | 586 (18)      | 4325 (47)     |
| Congenital                                        | 35 (2)        | 91 (2)        | 114 (4)       | 184 (2)       | 268 (8)       | 352 (4)       |
| Hypertrophic                                      | 48 (2)        | 71 (1)        | 68 (2)        | 128 (1)       | 153 (5)       | 209 (2)       |
| Restrictive                                       | 62 (3)        | 104 (2)       | 86 (3)        | 168 (2)       | 162 (5)       | 329 (4)       |
| Valvular                                          | 50 (3)        | 79 (1)        | 82 (3)        | 132 (1)       | 96 (3)        | 173 (2)       |
| Other                                             | 185 (9)       | 278 (5)       | 125 (4)       | 254 (3)       | 277 (9)       | 531 (6)       |
| ICD , n (%)                                       | 1096 (56)     | 3815 (67)     | 2356 (73)     | 7729 (79)     | 2187 (68)     | 7028 (77)     |
| Diabetes mellitus, n (%)                          | 431 (22)      | 1633 (29)     | 804 (25)      | 3083 (31)     | 633 (20)      | 2653 (29)     |
| Dialysis at listing, n (%)                        | 94 (5)        | 235 (4)       | 52 (2)        | 211 (2)       | 83 (3)        | 261 (3)       |
| Hypertension, n (%)                               | 670 (34)      | 2314 (40)     | 1205 (37)     | 4287 (44)     | 1189 (37)     | 4233 (46)     |
| Tobacco usage, n (%)                              | 661 (34)      | 2792 (49)     | 1254 (39)     | 5056 (52)     | 1023 (32)     | 4685 (51)     |
| Malignancy, n (%)                                 | 197 (10)      | 307 (5)       | 418 (13)      | 535 (5)       | 310 (10)      | 526 (6)       |
| PVD, n (%)                                        | 35 (2)        | 144 (3)       | 77 (2)        | 269 (3)       | 66 (2)        | 302 (3)       |
| Prior CVA, n (%)                                  | 86 (4)        | 316 (6)       | 178 (6)       | 537 (5)       | 138 (4)       | 421 (5)       |
| Antiarrhythmic, n (%)                             | 509 (26)      | 1829 (32)     | 839 (26)      | 2935 (30)     | 763 (24)      | 2630 (29)     |
| eGFR mls/min/1.73m <sup>2</sup> , median (Q1, Q3) | 65 (47,89)    | 67 (49,89)    | 66 (48,85)    | 67 (51,86)    | 63 (48,82)    | 65 (51,81)    |
| Serum Albumin g/dl, median (Q1, Q3)               | 3.3 (2.9,3.8) | 3.4 (3.0,3.9) | 3.7 (3.3,4.1) | 3.7 (3.2,4.1) | 4.0 (3.6,4.4) | 4.0 (3.6,4.3) |
| Mean PAP mmHg, median (Q1, Q3)                    | 30 (23,37)    | 32 (24,39)    | 29 (23,36)    | 31 (24,38)    | 26 (20,33)    | 28 (21,35)    |
| PCWP mmHg, median (Q1, Q3)                        | 20 (14,26)    | 22 (15, 28)   | 20 (14,25)    | 21 (15,27)    | 17 (12,23)    | 19 (13,25)    |
| CI l/min, median (Q1, Q3)                         | 2.1 (1.6,2.5) | 2.1 (1.7,2.6) | 2.0(1.7,2.5)  | 2.1(1.7,2.5)  | 2.2 (1.8,2.6) | 2.1 (1.8,2.5) |

|                                             |           |           |           |           |           |            |
|---------------------------------------------|-----------|-----------|-----------|-----------|-----------|------------|
| PVO <sub>2</sub> ml/kg/min, median (Q1, Q3) | 10 (8,13) | 11 (9,14) | 11 (9,13) | 12 (9,14) | 11 (9,14) | 12 (10,14) |
| Ventilator, n (%)                           | 219 (11)  | 439 (8)   | 41 (1)    | 101 (1)   | 12 (0)    | 59 (1)     |
| Inotrope, n (%)                             | 906 (46)  | 2403 (42) | 1691 (52) | 4880 (50) | 157 (5)   | 531 (6)    |
| LVAD, n (%)                                 | 447 (23)  | 1675 (29) | 655 (20)  | 2660 (27) | 72 (2)    | 241 (3)    |
| RVAD +/- LVAD, MCS unspecified,<br>n (%)    | 229 (12)  | 579 (10)  | 114 (4)   | 321 (3)   | 16 (1)    | 79 (1)     |
| TAH, n (%)                                  | 18 (1)    | 86 (2)    | *         | 32 (0)    | *         | 13 (0)     |
| ECMO, n (%)                                 | 121 (6)   | 200 (4)   | *         | *         | *         | *          |
| IABP, n (%)                                 | 300 (15)  | 966 (17)  | 57 (2)    | 167 (2)   | 33 (1)    | 97 (1)     |

\* = Frequency  $\leq$ 10 patients

y=years, Q1, Q3= 25-th and, 75-th percentiles., CMP=cardiomyopathy, CAD=coronary artery disease, ICD=implantable cardioverter-defibrillator, PVD=peripheral vascular disease, CVA=cerebral vascular accident, eGFR=estimated glomerular filtration rate, PAP=pulmonary arterial pressure, CI=cardiac index, PVO<sub>2</sub>=peak oxygen consumption, LVAD=left ventricular assist device, RVAD=right ventricular assist device, TAH=total artificial heart, MCS=mechanical circulatory support, ECMO=extracorporeal membrane oxygenation, IABP=intra-aortic balloon pump
